# Supplementary material
Source: Springer Nature journal article supplement (https://www.springermedizin.de/resource/supplementary/12885_2013_4475_MOESM4_ESM.pdf/9466514)

Level of Sirt3 (ratio of pT/T)

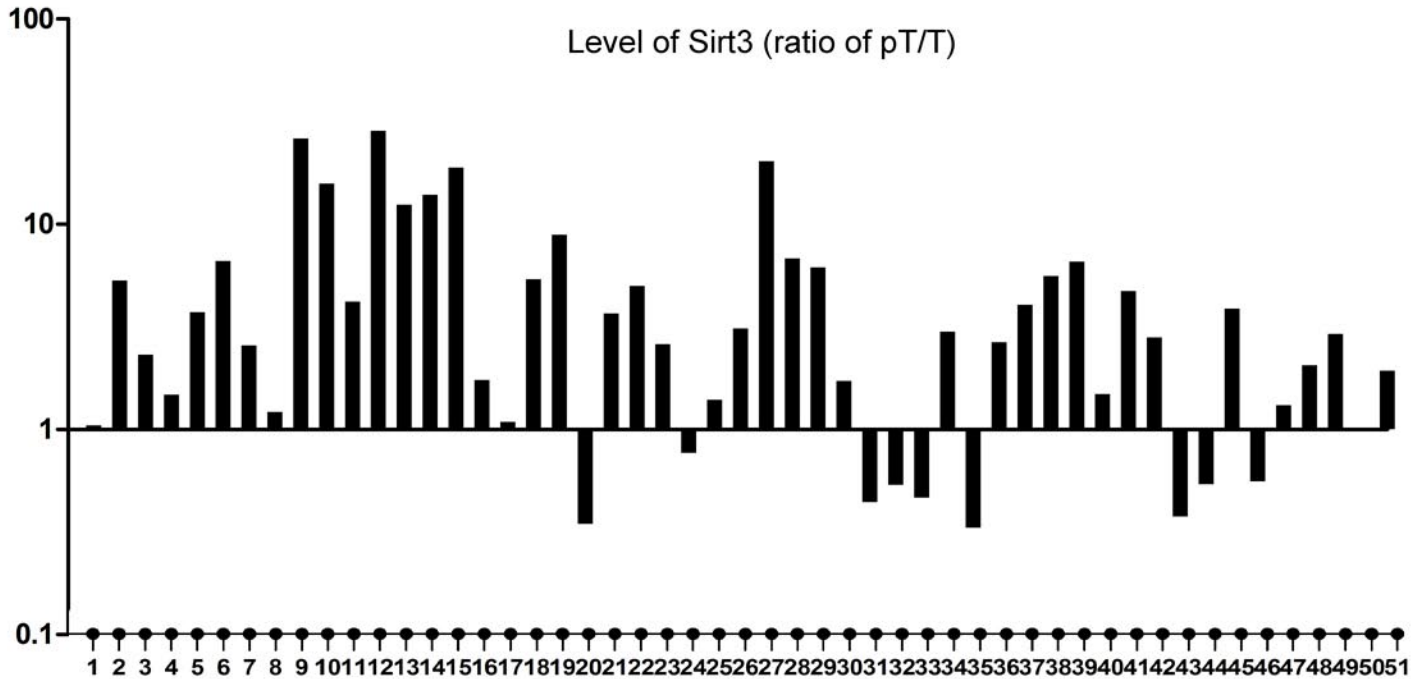

Supplement: MOESM4 [file 9466514]
